# Supplementary figures and images for: The European storm Kyrill in January 2007: synoptic evolution, meteorological impacts and some considerations with respect to climate change
Source: Copernicus journal article supplement (doi:10.5194/nhess-9-405-2009), 2009-03-19

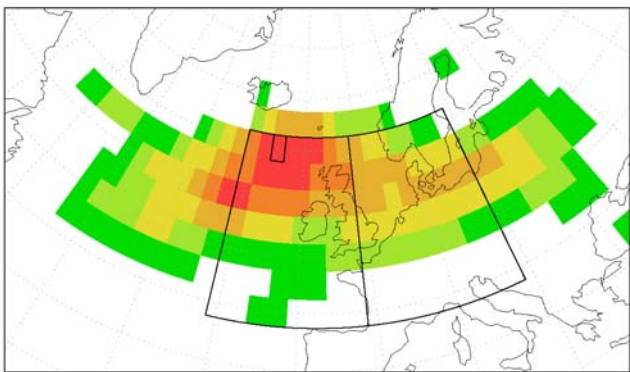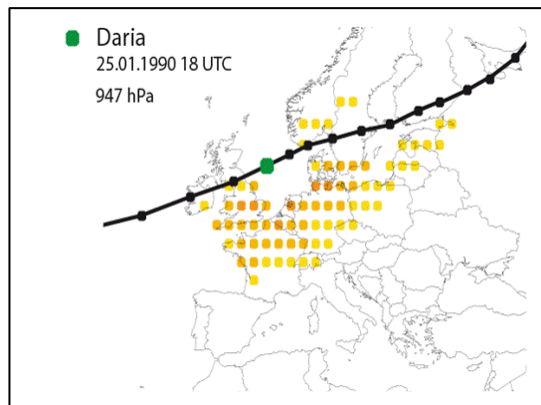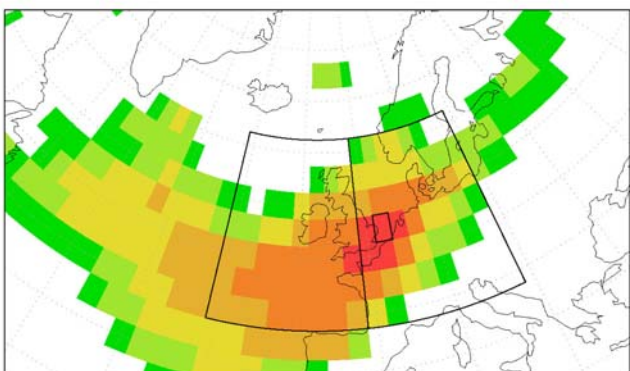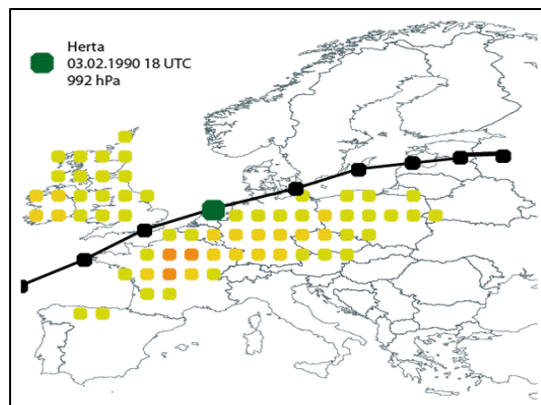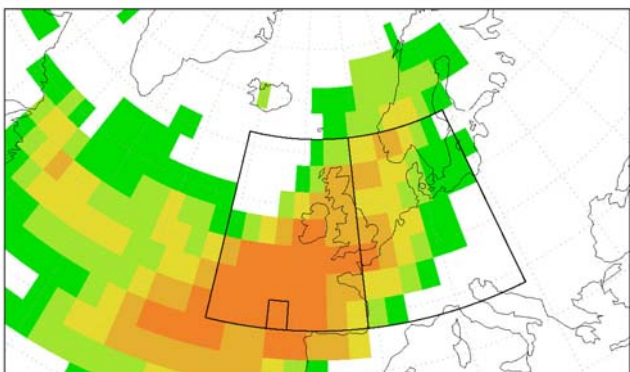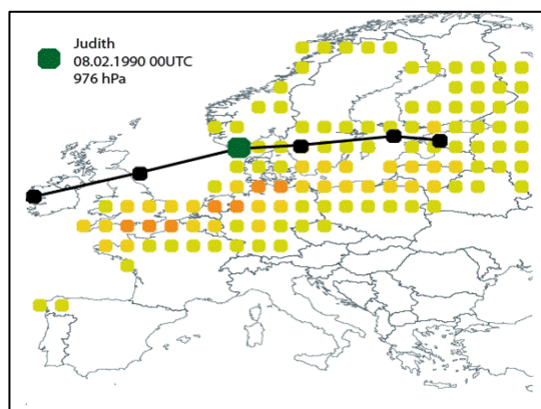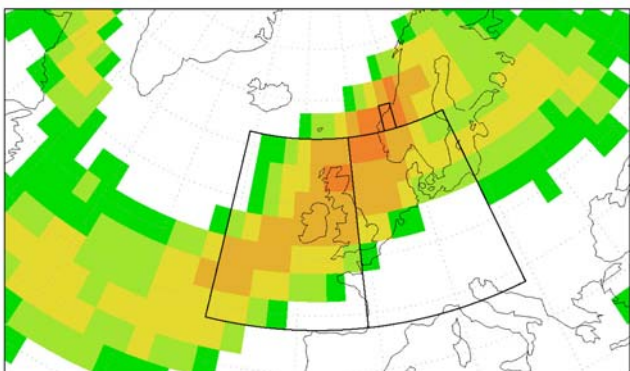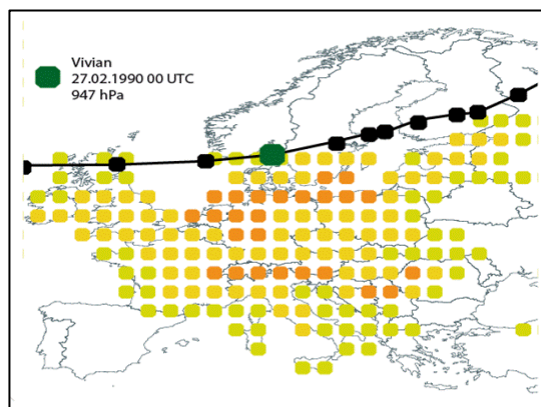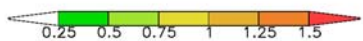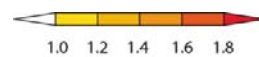

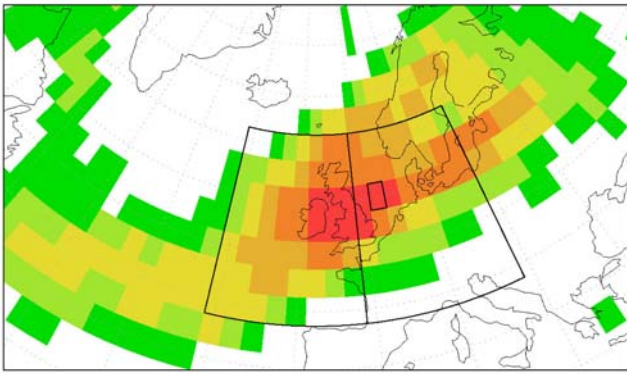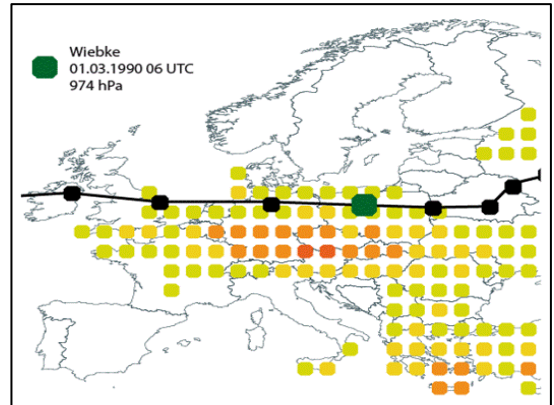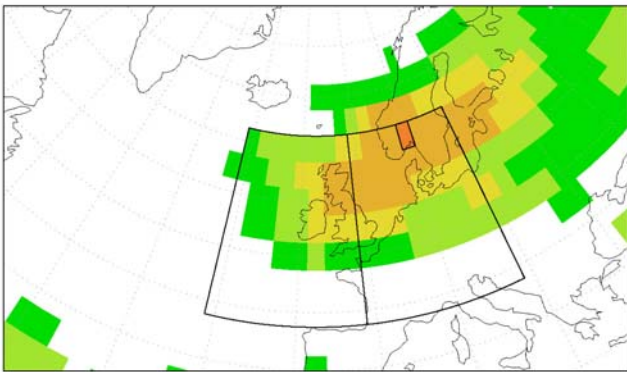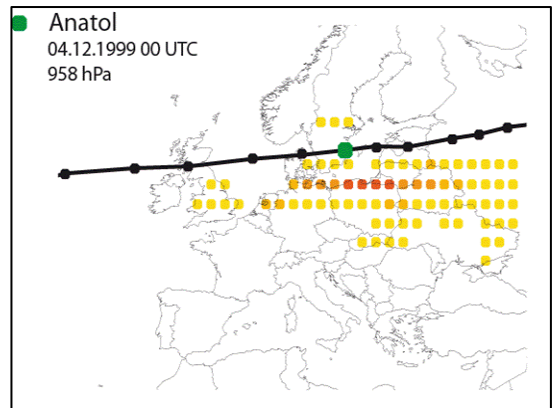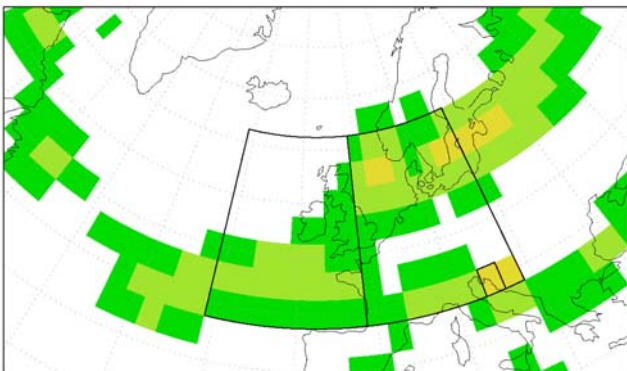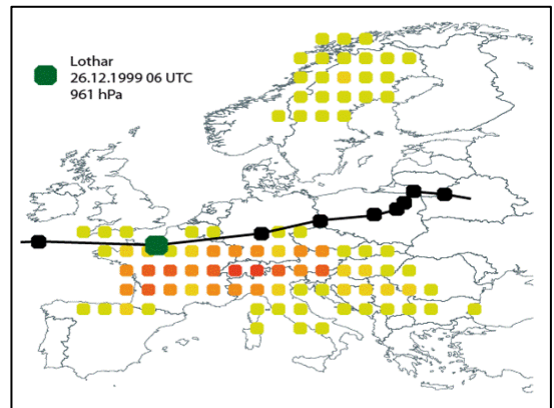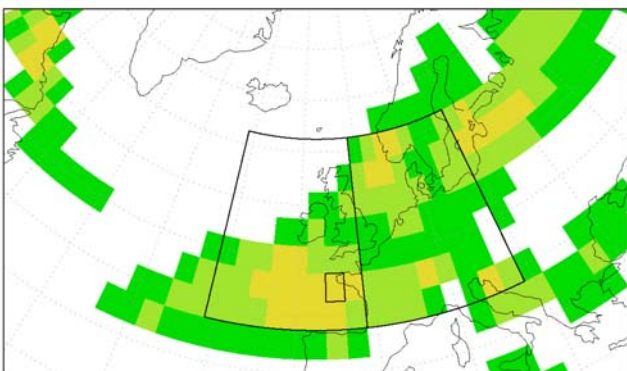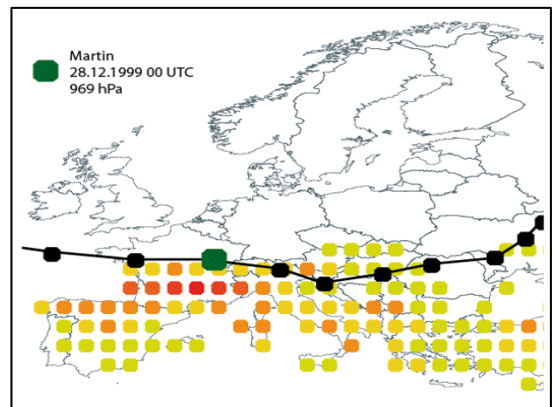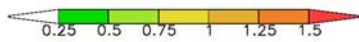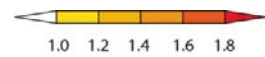

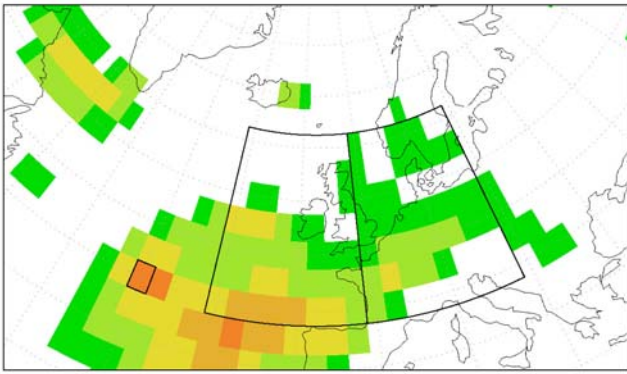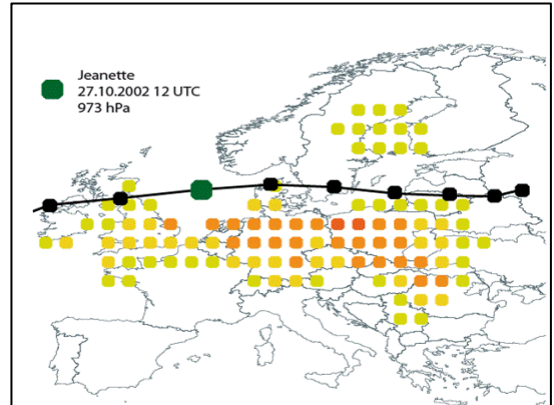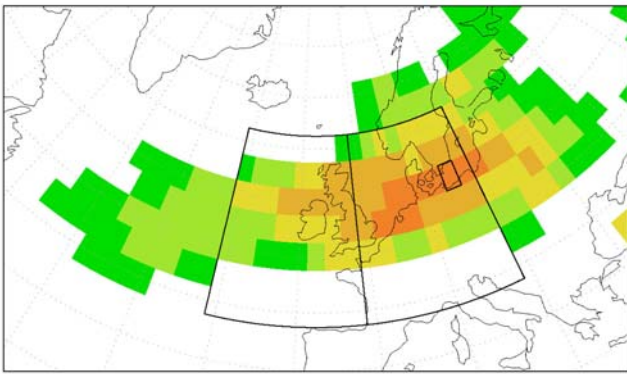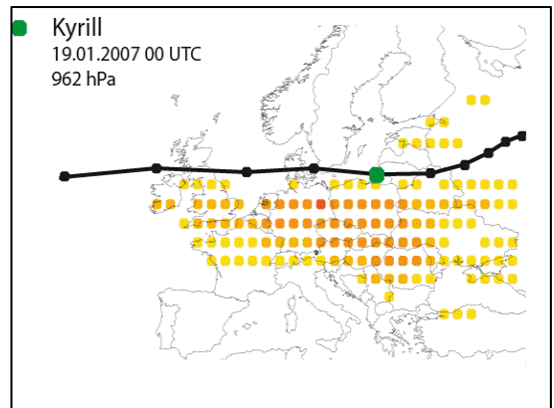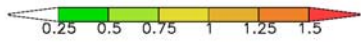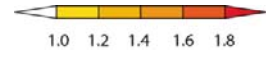

Supplement: Supplementary file 1 [file nhess-9-405-2009-supplement.pdf]
